# Supplementary material for: Rapid Laboratory Confirmation of the 2025 Ebola Sudan Virus Disease (Suvd) Index Case in Uganda
Source: Research Square preprint supplement (doi:10.21203/rs.3.rs-6446576/v1), 2025-05-13
Supplement: Supplementary file 1 [file 6f1aa224836fe2d32c9087c6.pdf]

**Supplementary Table 1: The number of QMS-related documents available and activities conducted at CERSL**

| Sn | Item                                                                                      | Status                                                               |
|----|-------------------------------------------------------------------------------------------|----------------------------------------------------------------------|
| 01 | SOPs (managerial, analytical & equipment)                                                 | 80 SOPs are effective & implemented                                  |
| 02 | Biosafety Manual based on ISO 15190, 35001 and WHO Biosafety and Biosecurity Manuals      | Effective & implemented                                              |
| 03 | ISO 15189:2022 complaint Quality Manual                                                   | Effective & implemented                                              |
| 04 | Laboratory Handbook                                                                       | Effective & implemented                                              |
| 05 | Testing Capacity and Periodic Evaluation                                                  |                                                                      |
|    | VHFs, SARS CoV2, Mpox                                                                     | 4 conducted                                                          |
|    | WWBS, AFI, ILI (Surveillance)                                                             | 3 conducted                                                          |
| 06 | 3-Dimensional Risk Assessment                                                             | 3 conducted                                                          |
| 07 | Process Mapping and optimization                                                          | 1 Conducted (at establishment)                                       |
| 08 | Equipment & Method Verification                                                           | 19 conducted,                                                        |
| 09 | External Quality Assurance (EQA)                                                          | Participating in 2 schemes, i.e., SARS-CoV-2 by NTRL and Mpox by WHO |
| 10 | Inter-laboratory comparison (ILC)                                                         | 3 conducted as per ISO 17043 & ISO 13528                             |
| 11 | Batch to batch & Lot to Lot Verification                                                  | Risk-based & Routinely Conducted                                     |
| 12 | Internal Quality Control                                                                  | Risk-based & Routinely Conducted                                     |
| 13 | Trainings:                                                                                | 11 conducted to technical & other staff                              |
|    | Laboratory Quality Management Systems based on ISO 15189, including CA, RM, MR, ISO 19011 |                                                                      |
|    | Biosafety Biosecurity                                                                     |                                                                      |
|    | Training on the different diagnostic techniques                                           |                                                                      |
| 14 | External Audits based on ISO 15189 & WHO Guidelines                                       | 6 conducted                                                          |
| 15 | Personnel File                                                                            | Complete for 23 personnel                                            |
| 16 | External Documents                                                                        | 117 are controlled & usable                                          |

*\*SOPs- Standard Operating Procedures, WHO- World Health Organization, WWBS- Wastewater Based Surveillance, AFI- Acute Febrile illnesses, ILI- Influenza Like illnesses, CA - Corrective Action, RM - Risk Management, MR- Management Review, Mpox- Monkeypox, NTRL- National Tuberculosis Reference Laboratory*
