# Supplementary material for: Rapid Laboratory Confirmation of the 2025 Ebola Sudan Virus Disease (Suvd) Index Case in Uganda
Source: Research Square preprint supplement (doi:10.21203/rs.3.rs-6446576/v1), 2025-05-13
Supplement: Supplementary file 2 [file 8143fcabe60d51b837500ba1.pdf]

**Supplementary Table 2: Biosafety and biosecurity measures undertaken at CESRL**

| <b>Sn</b>                   | <b>Biosafety measures</b>                                                                                                                                                                                                                                                                                                                                                                        | <b>Status</b>                                      |
|-----------------------------|--------------------------------------------------------------------------------------------------------------------------------------------------------------------------------------------------------------------------------------------------------------------------------------------------------------------------------------------------------------------------------------------------|----------------------------------------------------|
| <b>01</b>                   | Personal Protective Equipment: Gowns, gloves, masks (N95), goggles, face shields, Tyvek suits, scrub suits, head nets, lab shoes, gumboots                                                                                                                                                                                                                                                       | Stock levels are monitored & utility follows SOPs. |
| <b>02</b>                   | Three glove boxes - Bio-containment infrastructure.                                                                                                                                                                                                                                                                                                                                              | Verified and functional                            |
| <b>03</b>                   | Working with freshly prepared 0.5% bleach at the different stations                                                                                                                                                                                                                                                                                                                              | Consistently practiced                             |
| <b>04</b>                   | Working with freshly prepared 0.05% bleach for the hands at all the sinks                                                                                                                                                                                                                                                                                                                        | Consistently practiced                             |
| <b>05</b>                   | Hand washing soap and functioning sinks                                                                                                                                                                                                                                                                                                                                                          | Functionality & monitored                          |
| <b>06</b>                   | The laboratory is a Biosafety Level 3                                                                                                                                                                                                                                                                                                                                                            | BSL attributes are monitored                       |
| <b>07</b>                   | Autoclaving                                                                                                                                                                                                                                                                                                                                                                                      | Autoclaves (2) are available and functional        |
| <b>08</b>                   | “Buddy system” *                                                                                                                                                                                                                                                                                                                                                                                 | Practice is observed                               |
| <b>09</b>                   | Biosafety cabinets (Class 2B)                                                                                                                                                                                                                                                                                                                                                                    | Available and functioning                          |
| <b>Biosecurity Measures</b> |                                                                                                                                                                                                                                                                                                                                                                                                  |                                                    |
| <b>10</b>                   | The premises housing the laboratory are heavily secured and continuously monitored by police surveillance, both day and night.                                                                                                                                                                                                                                                                   | Strictly observed                                  |
| <b>11</b>                   | A camera surveillance system continuously monitors the laboratory.                                                                                                                                                                                                                                                                                                                               | Functional & positioning is strategic.             |
| <b>12</b>                   | All pathogen storage areas, including refrigerators and freezers, are securely locked to restrict unauthorized access.                                                                                                                                                                                                                                                                           | Strictly observed with an inventory list.          |
| <b>13</b>                   | Three biometric devices enforce restricted access to ensure only authorized personnel enter the laboratory premises. Two face recognition devices are installed—one at the entrance to the BSL-2 and another at the entrance to the BSL-3. Additionally, a fingerprint access control system is in place at the facility's main entrance, enhancing security and restricting unauthorized entry. | Available and functioning                          |
| <b>14</b>                   | Other Administrative controls                                                                                                                                                                                                                                                                                                                                                                    | Implemented as part of standard procedures.        |

*\*Buddy system: A system where a competent colleague watches over processes being done by other personnel to ensure safety and accuracy.*
